# Supplementary material for: Disease Burden and Risk Factors of Early-Onset Alzheimer’s Disease and other Dementias in China (1990–2021) with 20-Year Projections to 2041: A Global Burden of Disease Study Analysis
Source: Research Square preprint supplement (doi:10.21203/rs.3.rs-7495038/v1), 2025-09-30
Supplement: Supplementary file 1 [file c671795a893884ab8344fffb.docx]

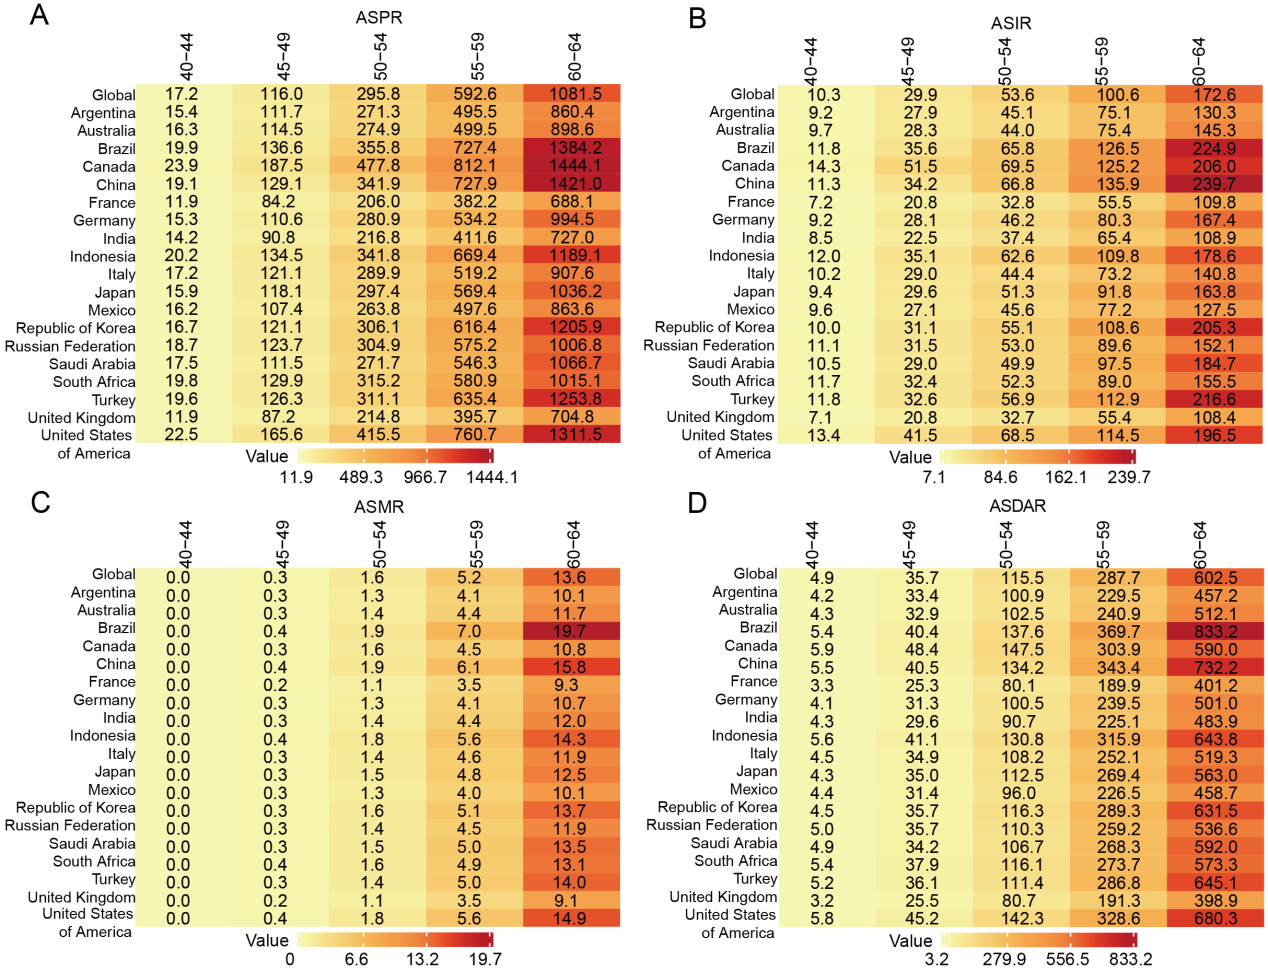


**Fig. S1** The burden of early-onset Alzheimer 's disease and other dementia (EOAD) in different age groups in G20 countries and globally (2021). **(A)** ASPR; **(B)** ASIR; **(C)** ASMR; **(D)** ASDAR. The heat map color gradient is used to show the degree of burden, from light yellow (lower burden) to deep red (higher burden). ASPR: Age-standardized prevalence rate; ASIR: Age-standardized incidence rate; ASMR: Age-standardized mortality rate; ASDAR: Age-standardized disability-adjusted life year rares


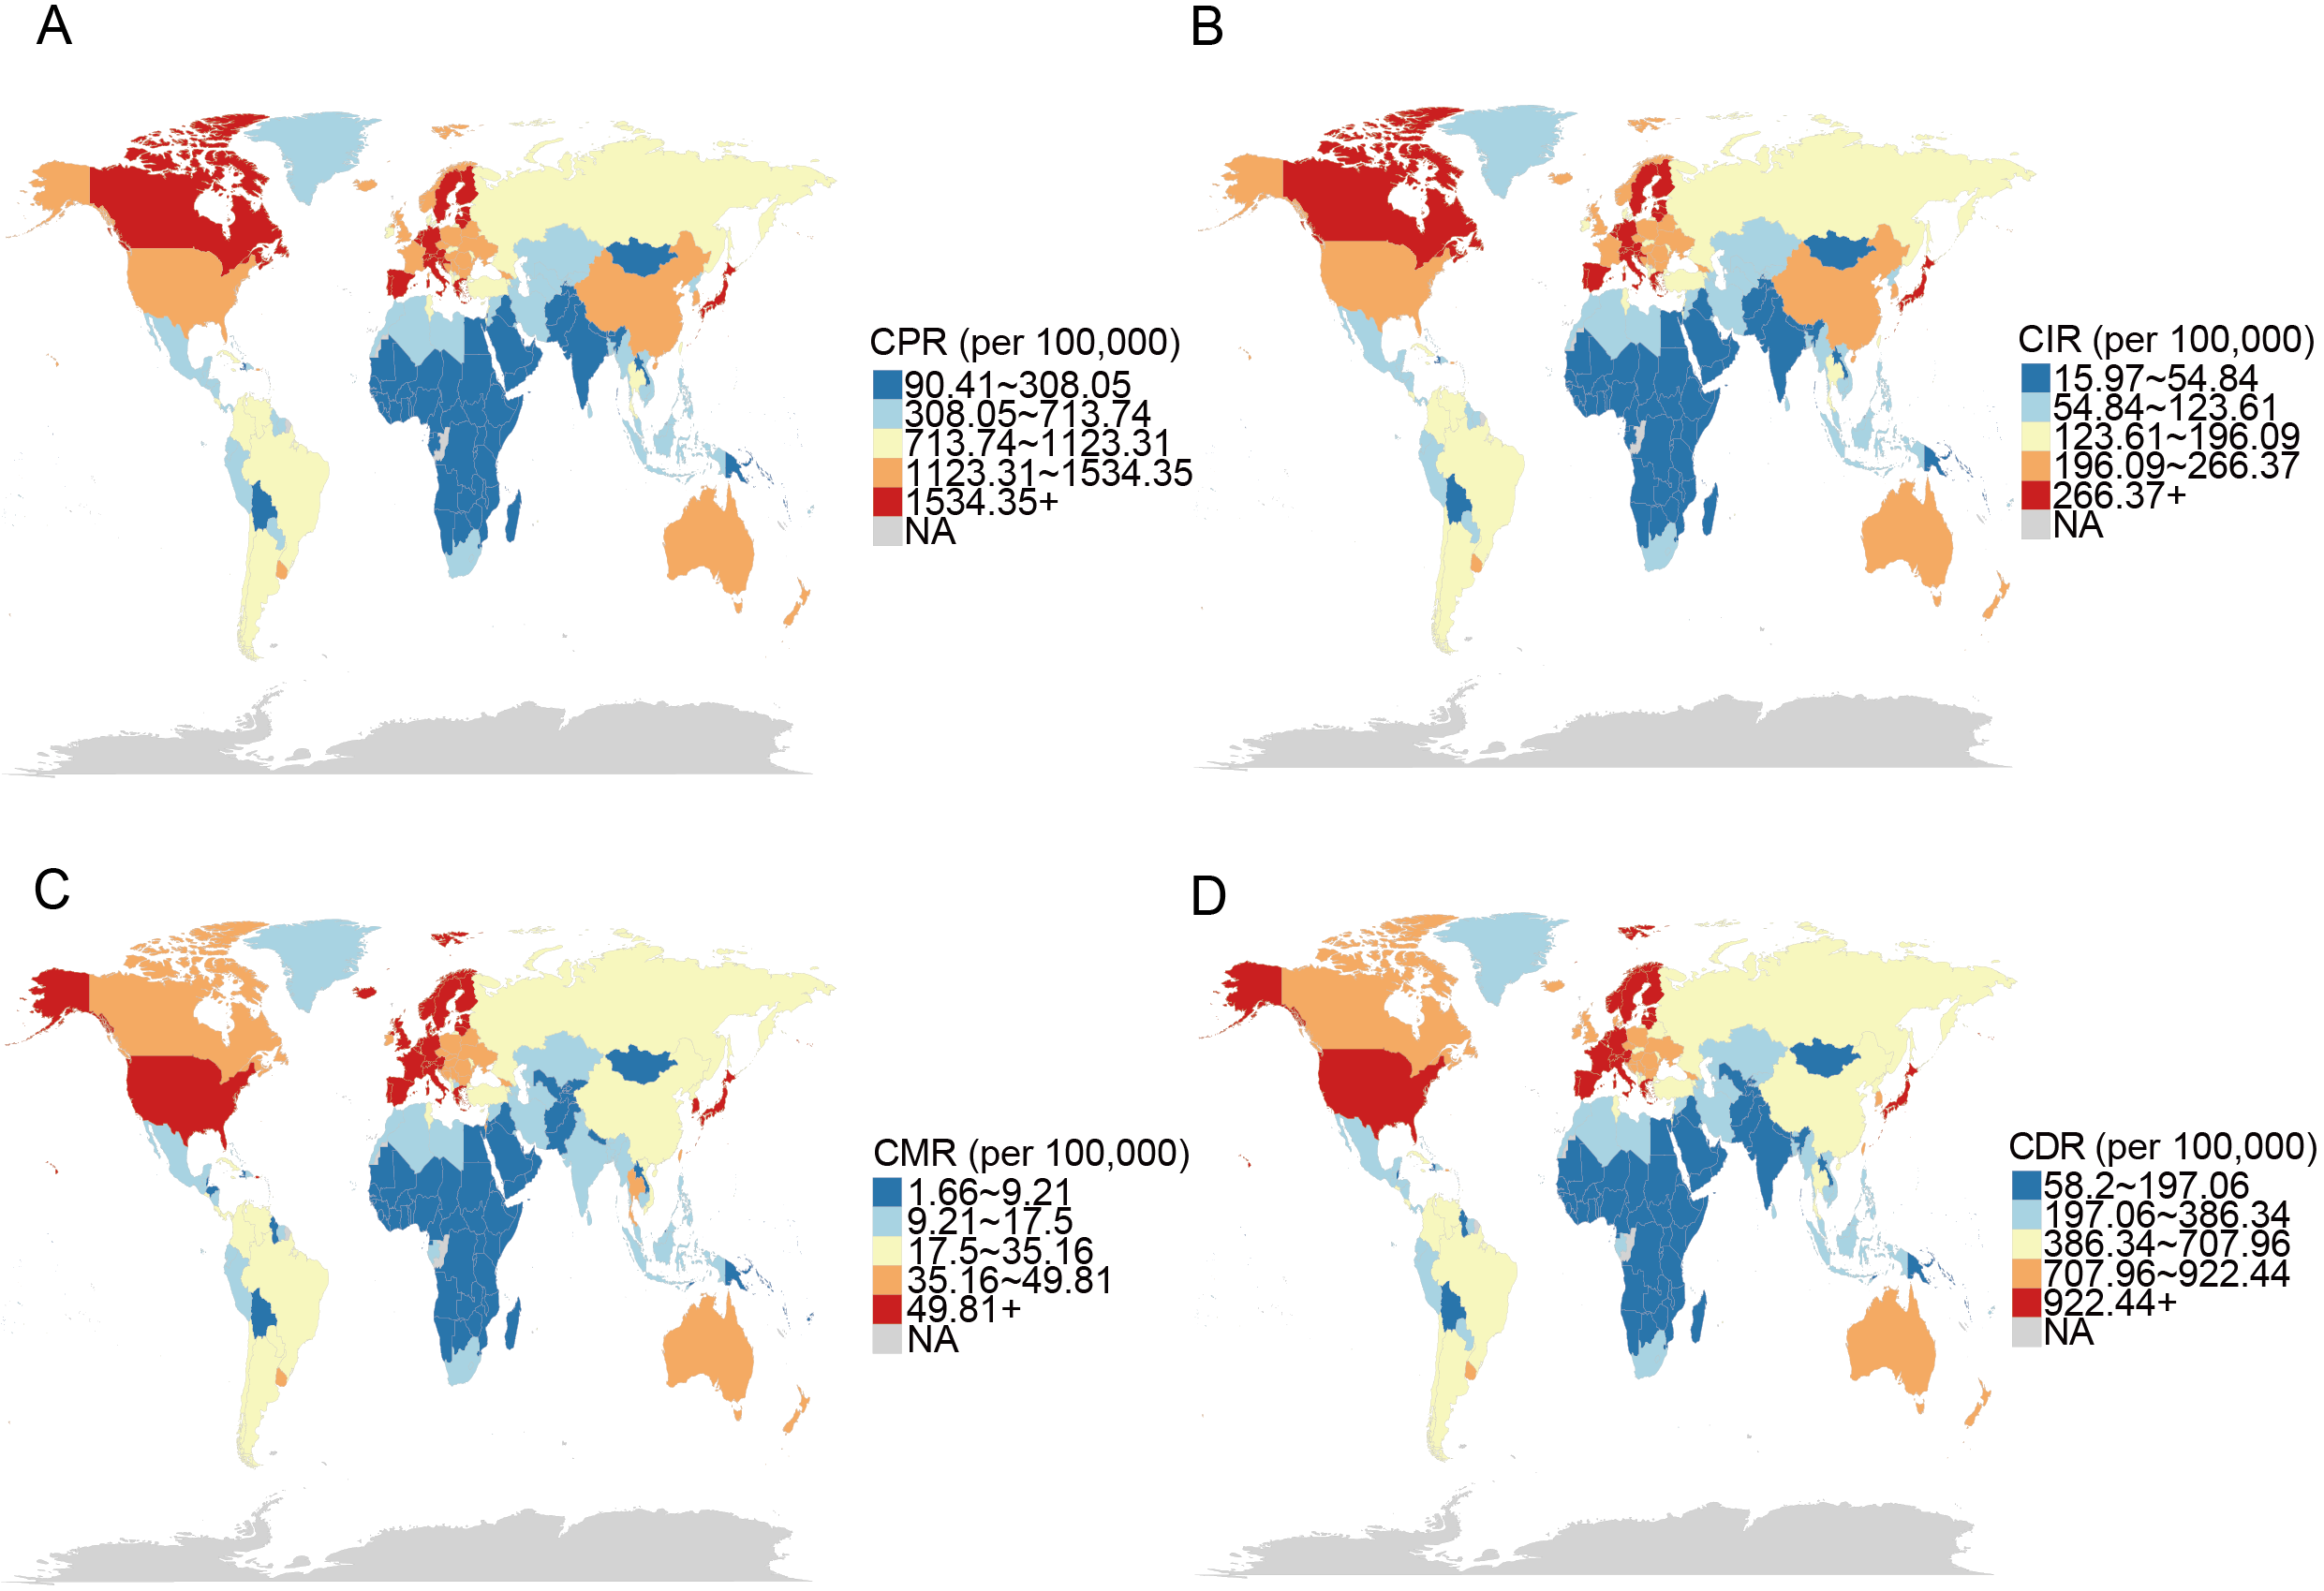


**Fig.S2** Geographical distribution of the global burden of EOAD in 2021. **(A)** CPR; **(B)** CIR; **(C)** CMR; **(D)** CDR, per 100,000 population. The map presents the burden intensity of different regions with a color gradient, from light blue (low burden) to deep red (high burden). CPR: Crude Prevalence Rate; CIR: Crude incidence rate; CMR: Crude Mortality Rate; CDR: Crude DALYs Rate


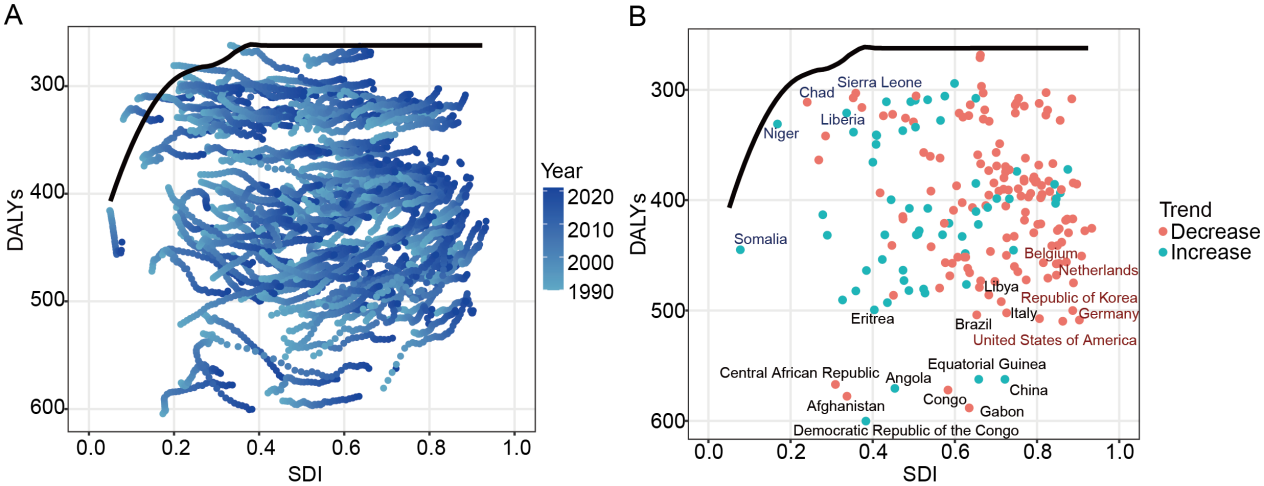


**Fig. S3** Frontier analysis (1990-2021) between SDI and DALYs caused by EOAD in 40-64 years old. **(A)** The trajectories of DALYs and SDI in different countries from 1990 to 2021. Each point represents a population DALYs (per 100,000 people) for a certain year in a country. The color of the point from light to dark represents the year from early to late (light blue represents 1990, dark blue represents 2020), and the point is connected into a line to represent the trajectory of a country. The black solid line represents the global expected DALYs benchmark level predicted by SDI. **(B)** The distribution map of DALYs and SDI in each country in 2021. The red dot indicates countries with a downward trend in DALYs from 1990 to 2021, and the blue-green dot indicates countries with rising DALYs. Country name labeling is used to highlight different types of performance: black fonts identify countries with high DALYs values, red fonts indicate countries with high SDI but still at a high level of DALYs, and blue fonts represent countries with low SDI and light DALYs burden.

**
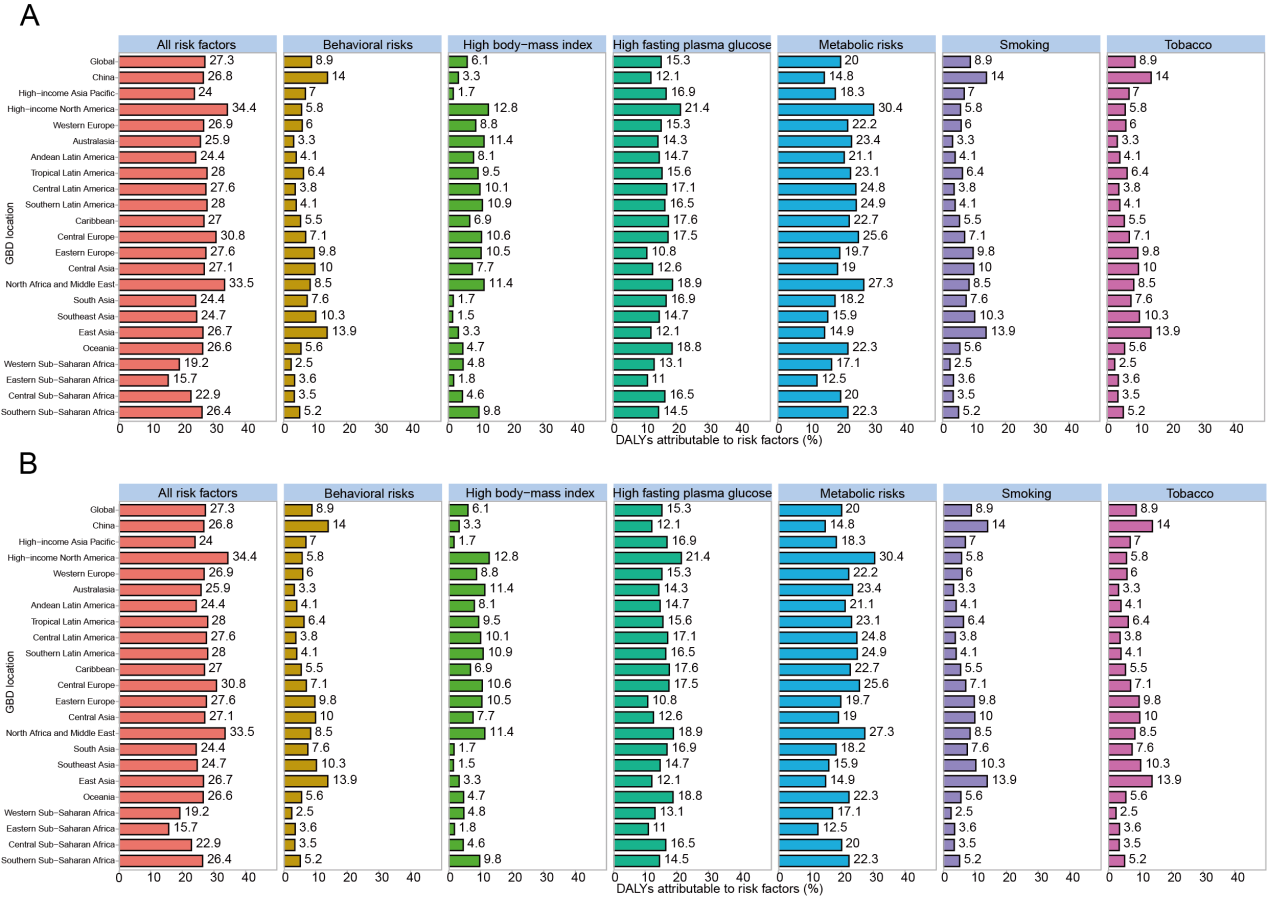
**

**Fig.S4** Percentage of DALYs attributable to various risk factors for EOAD in different GBD regions in 2021. **(A)** Attribution burden of risk factors in male population. **(B)** Attribution burden of risk factors in female population.

**Supplementary Table S1** Changes in the prevalence, morbidity, incidence, and DALYs and age-standardized rate of early-onset Alzheimer 's disease and other dementia in 19 member countries of the G20 (the 20th member country is the EU) from 1990 to 2021.

| Measure | Location | Number_1990 | Rate_1990 | Number_2021 | Rate_2021 | PC | AAPC_UI |
| --- | --- | --- | --- | --- | --- | --- | --- |
| Prevalence | Global | 21799761 (19067087, 24837693) | 672.22 (588.73, 763.95) | 56856688 (49382064, 64977512) | 694.01 (602.88, 794.08) | 3.20% | 0% (-0.02%, 0.03%) |
| Prevalence | Argentina | 182119 (156924, 207945) | 624.58 (540.01, 715.42) | 347969 (301069, 398592) | 592.53 (512.44, 676.59) | -5.10% | -0.18% (-0.2%, -0.16%) |
| Prevalence | Australia | 132333 (114608, 150477) | 702.82 (607.11, 797.96) | 300594 (262040, 338693) | 589.93 (513.23, 663.34) | -16.10% | -0.6% (-0.64%, -0.56%) |
| Prevalence | Brazil | 526396 (455692, 602287) | 759.73 (661.49, 864.32) | 1825795 (1586088, 2075169) | 761.45 (661.47, 869.62) | 0.20% | -0.05% (-0.09%, 0%) |
| Prevalence | Canada | 285210 (250854, 320424) | 885.63 (781.67, 993.27) | 631350 (556981, 707709) | 792.31 (701.61, 888.19) | -10.50% | -0.55% (-0.64%, -0.45%) |
| Prevalence | China | 4024536 (3446398, 4623086) | 703.14 (608.36, 809.51) | 16990827 (14488494, 19672741) | 900.82 (770.92, 1043.22) | 28.10% | 0.44% (0.35%, 0.53%) |
| Prevalence | France | 511500 (451626, 568213) | 553.5 (491.88, 615.65) | 924607 (807081, 1045108) | 525.22 (458.8, 593.27) | -5.10% | -0.2% (-0.23%, -0.16%) |
| Prevalence | Germany | 1093577 (962012, 1237640) | 809.57 (715.41, 909.95) | 1995249 (1724732, 2268186) | 820.5 (713.82, 930.77) | 1.40% | 0.06% (0.03%, 0.08%) |
| Prevalence | India | 1350128 (1162809, 1543953) | 440.05 (382.11, 503.9) | 4169684 (3591612, 4772663) | 436.13 (376.02, 501.15) | -0.90% | -0.16% (-0.21%, -0.12%) |
| Prevalence | Indonesia | 460740 (396354, 528840) | 678.72 (587.97, 777.61) | 1109364 (953356, 1273166) | 662.13 (571.11, 761.15) | -2.40% | -0.08% (-0.1%, -0.05%) |
| Prevalence | Italy | 633483 (535315, 736346) | 692.96 (589.47, 798.14) | 1427946 (1213976, 1647057) | 759.15 (652.54, 869.83) | 9.60% | 0.13% (-0.01%, 0.27%) |
| Prevalence | Japan | 1023227 (885710, 1169176) | 649.68 (564.43, 739.33) | 3367358 (2893951, 3872084) | 674.1 (584.78, 770.24) | 3.80% | 0.3% (0.24%, 0.36%) |
| Prevalence | Mexico | 200517 (172127, 230327) | 585.32 (506.17, 669.22) | 608490 (526098, 699600) | 534.2 (460.41, 612.87) | -8.70% | -0.2% (-0.24%, -0.16%) |
| Prevalence | Republic of Korea | 149622 (129867, 168608) | 751.01 (651.71, 856.59) | 697045 (609566, 789739) | 739.81 (647.7, 836.31) | -1.50% | 0.01% (-0.05%, 0.06%) |
| Prevalence | Russian Federation | 1044398 (900321, 1202421) | 669.98 (580.01, 769.14) | 1605863 (1392755, 1846536) | 661.42 (573.18, 758.61) | -1.30% | -0.08% (-0.13%, -0.03%) |
| Prevalence | Saudi Arabia | 30755 (26362, 35091) | 747.42 (639.76, 857.11) | 71832 (61576, 82118) | 701.74 (600.97, 807.91) | -6.10% | -0.2% (-0.22%, -0.19%) |
| Prevalence | South Africa | 109918 (94755, 125478) | 646.32 (559.39, 738.74) | 224953 (193264, 257575) | 609.51 (526.77, 695.77) | -5.70% | -0.16% (-0.17%, -0.15%) |
| Prevalence | Turkey | 235493 (203402, 268352) | 873.29 (753.94, 992.75) | 688425 (595237, 787216) | 819.36 (706.2, 936.59) | -6.20% | -0.25% (-0.27%, -0.23%) |
| Prevalence | United Kingdom | 607852 (521255, 696576) | 625.6 (539.95, 712.3) | 906467 (778218, 1036141) | 591.08 (508.13, 674.77) | -5.50% | -0.13% (-0.18%, -0.09%) |
| Prevalence | United States of America | 2736354 (2365020, 3137757) | 809.27 (700.87, 926.57) | 4876579 (4231620, 5601213) | 773.07 (670.26, 887.66) | -4.50% | -0.17% (-0.19%, -0.16%) |
| Incidence | Global | 3834526 (3367544, 4358428) | 116.97 (102.77, 132.32) | 9837056 (8620519, 11163700) | 119.76 (104.96, 135.89) | 2.40% | -0.02% (-0.04%, 0%) |
| Incidence | Argentina | 32950 (28371, 37756) | 112.19 (97.11, 128.39) | 62825 (54326, 72188) | 106.73 (92.2, 122.29) | -4.90% | -0.17% (-0.18%, -0.15%) |
| Incidence | Australia | 23451 (20535, 26658) | 122.93 (107.54, 138.36) | 52191 (45954, 58772) | 102.66 (90.27, 115.36) | -16.50% | -0.62% (-0.67%, -0.58%) |
| Incidence | Brazil | 90515 (79222, 102650) | 129.35 (113.26, 146.89) | 305421 (269292, 345696) | 127.08 (112.01, 144.66) | -1.80% | -0.11% (-0.15%, -0.07%) |
| Incidence | Canada | 48603 (43425, 54209) | 149.59 (134.39, 165.87) | 105264 (93819, 117160) | 132.4 (118.02, 147.29) | -11.50% | -0.55% (-0.61%, -0.48%) |
| Incidence | China | 703178 (601506, 808633) | 121.11 (105.5, 137.99) | 2914112 (2504728, 3350743) | 151.47 (131.22, 173.34) | 25.10% | 0.41% (0.33%, 0.49%) |
| Incidence | France | 91990 (82415, 101758) | 99.39 (89.46, 109.62) | 163141 (143062, 184345) | 93.63 (82.25, 105.56) | -5.80% | -0.22% (-0.26%, -0.19%) |
| Incidence | Germany | 200149 (178695, 222831) | 145.12 (130.54, 161.52) | 339825 (299328, 382749) | 142.13 (124.57, 159.72) | -2.10% | -0.1% (-0.13%, -0.07%) |
| Incidence | India | 241550 (209565, 274946) | 79.45 (68.69, 90.82) | 749490 (648646, 856823) | 78.92 (68.29, 90.58) | -0.70% | -0.16% (-0.21%, -0.11%) |
| Incidence | Indonesia | 78840 (68676, 89397) | 115.97 (101.07, 132) | 189722 (164142, 216604) | 113.31 (98.38, 129.52) | -2.30% | -0.07% (-0.09%, -0.05%) |
| Incidence | Italy | 106541 (89872, 123112) | 116.29 (98.96, 133.09) | 248809 (215069, 285482) | 134.76 (116.74, 153.65) | 15.90% | 0.28% (0.09%, 0.47%) |
| Incidence | Japan | 184306 (160124, 210886) | 115.81 (101.01, 131.94) | 576270 (503457, 662794) | 117.23 (102.05, 133.68) | 1.20% | 0.2% (0.15%, 0.26%) |
| Incidence | Mexico | 36269 (31428, 41673) | 106.03 (91.84, 120.63) | 110467 (96168, 125494) | 97.19 (84.27, 111.26) | -8.30% | -0.19% (-0.23%, -0.15%) |
| Incidence | Republic of Korea | 26566 (23162, 30284) | 127.7 (112.52, 145.12) | 117489 (102910, 133127) | 124.63 (109.44, 140.89) | -2.40% | 0.01% (-0.04%, 0.06%) |
| Incidence | Russian Federation | 183438 (158327, 212154) | 117.07 (102.29, 133.67) | 279806 (243531, 319869) | 115.89 (101.23, 131.98) | -1% | -0.07% (-0.12%, -0.03%) |
| Incidence | Saudi Arabia | 5403 (4676, 6166) | 127.34 (111.13, 146.35) | 13064 (11315, 14779) | 120.44 (104.42, 138.45) | -5.40% | -0.19% (-0.2%, -0.17%) |
| Incidence | South Africa | 19443 (16975, 21983) | 114.18 (99.52, 130.09) | 39715 (34529, 45264) | 107.78 (93.63, 122.59) | -5.60% | -0.16% (-0.17%, -0.14%) |
| Incidence | Turkey | 40370 (35493, 45675) | 147.22 (129.54, 166.99) | 117991 (102838, 133396) | 139.1 (120.57, 158.16) | -5.50% | -0.22% (-0.24%, -0.2%) |
| Incidence | United Kingdom | 112869 (97201, 130280) | 114.58 (99.74, 130.77) | 164947 (142721, 190062) | 107.93 (93.37, 123.89) | -5.80% | -0.17% (-0.2%, -0.13%) |
| Incidence | United States of America | 471556 (410796, 540646) | 138.61 (120.85, 157.59) | 822911 (718803, 935112) | 131.29 (113.93, 149.6) | -5.30% | -0.19% (-0.2%, -0.17%) |
| Mortality | Global | 663294 (163580, 1764991) | 25.04 (6.29, 66.28) | 1952677 (512981, 4984737) | 25.16 (6.68, 64.25) | 0.50% | -0.02% (-0.03%, -0.01%) |
| Mortality | Argentina | 5215 (1290, 14323) | 20.88 (5.2, 56.06) | 12020 (3078, 31562) | 20.21 (5.17, 53.04) | -3.20% | -0.06% (-0.07%, -0.04%) |
| Mortality | Australia | 4101 (1001, 10983) | 24.2 (6.03, 63.96) | 12846 (3361, 32378) | 22.89 (5.93, 57.75) | -5.40% | -0.16% (-0.18%, -0.14%) |
| Mortality | Brazil | 15457 (3832, 40591) | 28.16 (7.35, 73.41) | 63898 (16794, 161436) | 27.29 (7.15, 69.06) | -3.10% | -0.07% (-0.09%, -0.06%) |
| Mortality | Canada | 6682 (1705, 17577) | 22.03 (5.7, 57.72) | 18653 (4957, 47198) | 21.15 (5.57, 54) | -4% | -0.16% (-0.18%, -0.13%) |
| Mortality | China | 119809 (28349, 322103) | 31.39 (7.6, 83.63) | 491774 (124968, 1330182) | 30.82 (7.88, 82.43) | -1.80% | -0.19% (-0.23%, -0.15%) |
| Mortality | France | 20499 (5118, 54435) | 22.98 (5.79, 60.15) | 46573 (12129, 116347) | 21.69 (5.61, 54.3) | -5.60% | -0.18% (-0.2%, -0.16%) |
| Mortality | Germany | 37435 (9417, 94968) | 29.5 (7.52, 73.8) | 78577 (21416, 186714) | 29.25 (7.91, 69.29) | -0.80% | -0.07% (-0.12%, -0.02%) |
| Mortality | India | 30324 (6852, 88796) | 13.35 (3.01, 38.49) | 133287 (31384, 367633) | 16.98 (4.05, 46.35) | 27.20% | 0.89% (0.82%, 0.95%) |
| Mortality | Indonesia | 8976 (2114, 25126) | 17.55 (4.1, 47.58) | 26277 (6326, 72878) | 22.97 (5.62, 63.06) | 30.90% | 0.77% (0.68%, 0.87%) |
| Mortality | Italy | 25599 (6506, 67615) | 31.5 (8.08, 81.26) | 64759 (17891, 156721) | 29.75 (8.1, 72.88) | -5.60% | -0.09% (-0.13%, -0.05%) |
| Mortality | Japan | 36973 (9425, 96174) | 27.18 (7.14, 69.33) | 172807 (50406, 398754) | 26.33 (7.39, 62.16) | -3.10% | -0.07% (-0.1%, -0.04%) |
| Mortality | Mexico | 4203 (1005, 11878) | 15.1 (3.65, 41.69) | 15548 (3646, 43852) | 14.8 (3.49, 41.39) | -2% | -0.07% (-0.09%, -0.06%) |
| Mortality | Republic of Korea | 4925 (1232, 12867) | 35.68 (9.05, 90) | 25859 (6917, 62627) | 29.02 (7.87, 69.71) | -18.70% | -0.53% (-0.6%, -0.46%) |
| Mortality | Russian Federation | 26902 (6595, 75553) | 21.62 (5.27, 59.64) | 50932 (12579, 141824) | 21.05 (5.19, 58.31) | -2.60% | -0.09% (-0.1%, -0.08%) |
| Mortality | Saudi Arabia | 934 (223, 2463) | 28.48 (6.96, 74.02) | 1696 (409, 4714) | 25.85 (6.36, 71.39) | -9.20% | -0.36% (-0.39%, -0.33%) |
| Mortality | South Africa | 3120 (759, 8446) | 21.16 (5.19, 57.34) | 6666 (1615, 18627) | 22.58 (5.4, 61.8) | 6.70% | 0.18% (0.09%, 0.26%) |
| Mortality | Turkey | 6866 (1707, 18082) | 30.08 (7.54, 79.27) | 20001 (5054, 52548) | 26.16 (6.61, 69.03) | -13% | -0.45% (-0.59%, -0.32%) |
| Mortality | United Kingdom | 21688 (5405, 58197) | 23.69 (5.96, 62.48) | 37559 (9844, 94974) | 22.61 (5.88, 57.62) | -4.60% | -0.09% (-0.13%, -0.05%) |
| Mortality | United States of America | 99957 (25910, 258206) | 29.64 (7.72, 76.08) | 198045 (53297, 494055) | 29.17 (7.74, 73.52) | -1.60% | -0.08% (-0.09%, -0.06%) |
| DALYs | Global | 13572308 (6439341, 29586865) | 445.75 (206.08, 958.03) | 36332687 (17237624, 76873276) | 450.98 (212.69, 950.16) | 1.20% | -0.02% (-0.03%, 0%) |
| DALYs | Argentina | 105932 (52094, 225365) | 382.45 (185.41, 805.4) | 217920 (103875, 455816) | 369.59 (176.33, 772.22) | -3.40% | -0.09% (-0.1%, -0.07%) |
| DALYs | Australia | 79881 (38809, 167478) | 439.01 (211.17, 915.75) | 210791 (97742, 437602) | 398.66 (187.36, 824.12) | -9.20% | -0.32% (-0.33%, -0.31%) |
| DALYs | Brazil | 332564 (155594, 736269) | 511.96 (234.64, 1114.18) | 1201684 (564832, 2563994) | 503.99 (236.06, 1073.53) | -1.60% | -0.06% (-0.07%, -0.05%) |
| DALYs | Canada | 142377 (73455, 282907) | 450.78 (230.93, 891.1) | 345631 (172913, 685499) | 417.19 (213, 829.97) | -7.50% | -0.35% (-0.4%, -0.3%) |
| DALYs | China | 2702484 (1239177, 6085395) | 534.47 (236.2, 1190.6) | 10072478 (4947154, 22219154) | 562.39 (271.16, 1238.81) | 5.20% | -0.02% (-0.07%, 0.02%) |
| DALYs | France | 352243 (162106, 767033) | 388.02 (176.76, 835.11) | 699416 (319077, 1483216) | 366.86 (171.08, 763.86) | -5.50% | -0.18% (-0.2%, -0.17%) |
| DALYs | Germany | 674607 (328264, 1415808) | 510.92 (245.56, 1063.38) | 1288751 (625382, 2595514) | 508.64 (250.83, 1028.42) | -0.40% | -0.05% (-0.09%, -0.01%) |
| DALYs | India | 760230 (352482, 1776414) | 262.07 (122.6, 600.9) | 2787339 (1236932, 6211031) | 305.73 (135.42, 676.67) | 16.70% | 0.52% (0.48%, 0.56%) |
| DALYs | Indonesia | 232715 (116393, 493915) | 365.07 (178.21, 779.12) | 633905 (302564, 1387130) | 422 (194.37, 933.56) | 15.60% | 0.41% (0.35%, 0.48%) |
| DALYs | Italy | 450863 (205649, 977093) | 516.62 (233.92, 1110.05) | 1008203 (479893, 2046522) | 507.4 (243.87, 1036.59) | -1.80% | -0.03% (-0.06%, 0%) |
| DALYs | Japan | 688560 (323202, 1492468) | 460.57 (214.58, 985.33) | 2539294 (1209735, 5046913) | 456 (221.79, 920.17) | -1% | 0.03% (0.01%, 0.06%) |
| DALYs | Mexico | 100577 (50171, 215759) | 309.4 (150.68, 660.7) | 331079 (163369, 717517) | 296.84 (144.66, 642.67) | -4.10% | -0.11% (-0.12%, -0.1%) |
| DALYs | Republic of Korea | 101642 (47102, 222693) | 580.65 (260.79, 1256.03) | 461797 (218816, 928411) | 500.05 (234.92, 1004.38) | -13.90% | -0.36% (-0.41%, -0.31%) |
| DALYs | Russian Federation | 589959 (286543, 1293549) | 406.03 (192.39, 878.44) | 971902 (459547, 2086551) | 397.87 (188.83, 852.89) | -2% | -0.08% (-0.1%, -0.06%) |
| DALYs | Saudi Arabia | 19124 (8991, 40204) | 501.05 (232.4, 1064.97) | 40839 (19150, 87867) | 456.71 (208.96, 1019.77) | -8.80% | -0.33% (-0.35%, -0.31%) |
| DALYs | South Africa | 64719 (31062, 139266) | 396.83 (186.63, 850.32) | 140199 (65093, 313929) | 406.65 (185.95, 901.85) | 2.50% | 0.07% (0.01%, 0.13%) |
| DALYs | Turkey | 141131 (68914, 297639) | 551.48 (267.29, 1158.43) | 401906 (196644, 841832) | 491.99 (236.53, 1031.11) | -10.80% | -0.4% (-0.47%, -0.32%) |
| DALYs | United Kingdom | 388789 (183323, 833867) | 409.43 (191.44, 870.23) | 615410 (288559, 1286176) | 390.4 (183.98, 817.67) | -4.60% | -0.1% (-0.13%, -0.08%) |
| DALYs | United States of America | 1789056 (842342, 3821142) | 528.79 (248.85, 1122.13) | 3318643 (1550259, 6957871) | 509.74 (240.09, 1068.07) | -3.60% | -0.15% (-0.16%, -0.13%) |

**Supplementary Table S2** The age-standardized predictive value and its 95 % UI of the main epidemiological indicators of early-onset Alzheimer 's disease and other dementia in China from 2022 to 2041 were disaggregated by gender.

| Measure | Sex | Year | Forecast_Value | Lower_95 | Upper_95 |
| --- | --- | --- | --- | --- | --- |
| Prevalence | Male | 2022 | 762.8534004 | 747.0112955 | 778.6955054 |
| Prevalence | Male | 2023 | 768.8467221 | 738.3175868 | 799.3758573 |
| Prevalence | Male | 2024 | 774.8400437 | 734.6768278 | 815.0032596 |
| Prevalence | Male | 2025 | 780.8333653 | 732.9361866 | 828.730544 |
| Prevalence | Male | 2026 | 786.8266869 | 732.2813339 | 841.37204 |
| Prevalence | Male | 2027 | 792.8200086 | 732.3530643 | 853.2869528 |
| Prevalence | Male | 2028 | 798.8133302 | 732.9550948 | 864.6715655 |
| Prevalence | Male | 2029 | 804.8066518 | 733.9662468 | 875.6470568 |
| Prevalence | Male | 2030 | 810.7999734 | 735.3054784 | 886.2944685 |
| Prevalence | Male | 2031 | 816.7932951 | 736.915422 | 896.6711681 |
| Prevalence | Male | 2032 | 822.7866167 | 738.753704 | 906.8195294 |
| Prevalence | Male | 2033 | 828.7799383 | 740.7879715 | 916.7719051 |
| Prevalence | Male | 2034 | 834.7732599 | 742.9928588 | 926.5536611 |
| Prevalence | Male | 2035 | 840.7665816 | 745.3480412 | 936.1851219 |
| Prevalence | Male | 2036 | 846.7599032 | 747.8369349 | 945.6828715 |
| Prevalence | Male | 2037 | 852.7532248 | 750.4457985 | 955.0606511 |
| Prevalence | Male | 2038 | 858.7465464 | 753.1630947 | 964.3299982 |
| Prevalence | Male | 2039 | 864.7398681 | 755.9790245 | 973.5007116 |
| Prevalence | Male | 2040 | 870.7331897 | 758.8851816 | 982.5811978 |
| Prevalence | Male | 2041 | 876.7265113 | 761.8742901 | 991.5787325 |
| Prevalence | Female | 2022 | 1076.297533 | 1046.667362 | 1105.927703 |
| Prevalence | Female | 2023 | 1110.509652 | 1055.259482 | 1165.759821 |
| Prevalence | Female | 2024 | 1134.980476 | 1056.03501 | 1213.925942 |
| Prevalence | Female | 2025 | 1153.861412 | 1053.487283 | 1254.235541 |
| Prevalence | Female | 2026 | 1169.53468 | 1049.842672 | 1289.226689 |
| Prevalence | Female | 2027 | 1183.367279 | 1046.176913 | 1320.557645 |
| Prevalence | Female | 2028 | 1196.143638 | 1042.979701 | 1349.307576 |
| Prevalence | Female | 2029 | 1208.313892 | 1040.444175 | 1376.183609 |
| Prevalence | Female | 2030 | 1220.136341 | 1038.616963 | 1401.655718 |
| Prevalence | Female | 2031 | 1231.759208 | 1037.47597 | 1426.042446 |
| Prevalence | Female | 2032 | 1243.267548 | 1036.970261 | 1449.564835 |
| Prevalence | Female | 2033 | 1254.710168 | 1037.04 | 1472.380337 |
| Prevalence | Female | 2034 | 1266.115077 | 1037.625951 | 1494.604203 |
| Prevalence | Female | 2035 | 1277.498345 | 1038.673574 | 1516.323116 |
| Prevalence | Female | 2036 | 1288.869195 | 1040.134414 | 1537.603976 |
| Prevalence | Female | 2037 | 1300.232919 | 1041.96619 | 1558.499648 |
| Prevalence | Female | 2038 | 1311.592554 | 1044.132305 | 1579.052803 |
| Prevalence | Female | 2039 | 1322.949843 | 1046.601163 | 1599.298522 |
| Prevalence | Female | 2040 | 1334.305785 | 1049.345456 | 1619.266113 |
| Prevalence | Female | 2041 | 1345.660954 | 1052.341517 | 1638.980391 |
| Incidence | Male | 2022 | 131.6984705 | 129.1284359 | 134.2685051 |
| Incidence | Male | 2023 | 132.6988242 | 127.7176537 | 137.6799947 |
| Incidence | Male | 2024 | 133.6991778 | 127.1402876 | 140.2580681 |
| Incidence | Male | 2025 | 134.6995315 | 126.8748256 | 142.5242374 |
| Incidence | Male | 2026 | 135.6998852 | 126.7873656 | 144.6124047 |
| Incidence | Male | 2027 | 136.7002388 | 126.8189441 | 146.5815336 |
| Incidence | Male | 2028 | 137.7005925 | 126.9373696 | 148.4638154 |
| Incidence | Male | 2029 | 138.7009462 | 127.1227792 | 150.2791131 |
| Incidence | Male | 2030 | 139.7012998 | 127.3618942 | 152.0407054 |
| Incidence | Male | 2031 | 140.7016535 | 127.6453174 | 153.7579896 |
| Incidence | Male | 2032 | 141.7020072 | 127.9661091 | 155.4379052 |
| Incidence | Male | 2033 | 142.7023608 | 128.3189719 | 157.0857497 |
| Incidence | Male | 2034 | 143.7027145 | 128.6997529 | 158.7056761 |
| Incidence | Male | 2035 | 144.7030682 | 129.1051247 | 160.3010116 |
| Incidence | Male | 2036 | 145.7034218 | 129.532373 | 161.8744707 |
| Incidence | Male | 2037 | 146.7037755 | 129.9792485 | 163.4283024 |
| Incidence | Male | 2038 | 147.7041291 | 130.4438631 | 164.9643952 |
| Incidence | Male | 2039 | 148.7044828 | 130.9246131 | 166.4843525 |
| Incidence | Male | 2040 | 149.7048365 | 131.420123 | 167.98955 |
| Incidence | Male | 2041 | 150.7051901 | 131.9292021 | 169.4811782 |
| Incidence | Female | 2022 | 179.2734152 | 174.9404098 | 183.6064206 |
| Incidence | Female | 2023 | 184.2720756 | 176.1974289 | 192.3467223 |
| Incidence | Female | 2024 | 187.8600777 | 176.3277969 | 199.3923584 |
| Incidence | Female | 2025 | 190.6404983 | 175.9832217 | 205.2977748 |
| Incidence | Female | 2026 | 192.9585902 | 175.4853055 | 210.4318748 |
| Incidence | Female | 2027 | 195.0120056 | 174.9886309 | 215.0353804 |
| Incidence | Female | 2028 | 196.9138977 | 174.5630174 | 219.2647779 |
| Incidence | Female | 2029 | 198.7290447 | 174.2355709 | 223.2225185 |
| Incidence | Female | 2030 | 200.4945316 | 174.0124082 | 226.9766549 |
| Incidence | Female | 2031 | 202.2315886 | 173.8898774 | 230.5732998 |
| Incidence | Female | 2032 | 203.9523701 | 173.860287 | 234.0444532 |
| Incidence | Female | 2033 | 205.6638339 | 173.9147529 | 237.412915 |
| Incidence | Female | 2034 | 207.3699637 | 174.0445442 | 240.6953831 |
| Incidence | Female | 2035 | 209.0730396 | 174.2416559 | 243.9044233 |
| Incidence | Female | 2036 | 210.7743674 | 174.4989947 | 247.0497401 |
| Incidence | Female | 2037 | 212.4746943 | 174.8103815 | 250.1390071 |
| Incidence | Female | 2038 | 214.1744483 | 175.1704749 | 253.1784217 |
| Incidence | Female | 2039 | 215.8738742 | 175.5746668 | 256.1730817 |
| Incidence | Female | 2040 | 217.5731124 | 176.0189775 | 259.1272474 |
| Incidence | Female | 2041 | 219.2722431 | 176.4999585 | 262.0445277 |
| Mortality | Male | 2022 | 25.60641502 | 25.12292926 | 26.08990077 |
| Mortality | Male | 2023 | 25.39402703 | 24.79680118 | 25.99125288 |
| Mortality | Male | 2024 | 25.24001382 | 24.59092565 | 25.88910199 |
| Mortality | Male | 2025 | 25.1283311 | 24.45356876 | 25.80309344 |
| Mortality | Male | 2026 | 25.04734435 | 24.35946575 | 25.73522295 |
| Mortality | Male | 2027 | 24.98861678 | 24.29394043 | 25.68329313 |
| Mortality | Male | 2028 | 24.94603047 | 24.24780612 | 25.64425482 |
| Mortality | Male | 2029 | 24.915149 | 24.21506617 | 25.61523182 |
| Mortality | Male | 2030 | 24.89275529 | 24.19169717 | 25.5938134 |
| Mortality | Male | 2031 | 24.87651648 | 24.17494606 | 25.5780869 |
| Mortality | Male | 2032 | 24.86474091 | 24.16290125 | 25.56658057 |
| Mortality | Male | 2033 | 24.85620185 | 24.15422065 | 25.55818305 |
| Mortality | Male | 2034 | 24.85000975 | 24.14795413 | 25.55206536 |
| Mortality | Male | 2035 | 24.84551954 | 24.1434248 | 25.54761428 |
| Mortality | Male | 2036 | 24.84226347 | 24.14014815 | 25.54437879 |
| Mortality | Male | 2037 | 24.83990233 | 24.13777619 | 25.54202846 |
| Mortality | Male | 2038 | 24.83819014 | 24.13605832 | 25.54032197 |
| Mortality | Male | 2039 | 24.83694855 | 24.13481374 | 25.53908337 |
| Mortality | Male | 2040 | 24.83604822 | 24.13391183 | 25.5381846 |
| Mortality | Male | 2041 | 24.83539533 | 24.13325812 | 25.53753255 |
| Mortality | Female | 2022 | 33.79941248 | 33.24222503 | 34.35659993 |
| Mortality | Female | 2023 | 33.79941248 | 33.01143043 | 34.58739453 |
| Mortality | Female | 2024 | 33.79941248 | 32.83433551 | 34.76448945 |
| Mortality | Female | 2025 | 33.79941248 | 32.68503758 | 34.91378738 |
| Mortality | Female | 2026 | 33.79941248 | 32.55350347 | 35.04532149 |
| Mortality | Female | 2027 | 33.79941248 | 32.43458754 | 35.16423742 |
| Mortality | Female | 2028 | 33.79941248 | 32.32523306 | 35.2735919 |
| Mortality | Female | 2029 | 33.79941248 | 32.22344839 | 35.37537657 |
| Mortality | Female | 2030 | 33.79941248 | 32.12785013 | 35.47097483 |
| Mortality | Female | 2031 | 33.79941248 | 32.03743106 | 35.5613939 |
| Mortality | Female | 2032 | 33.79941248 | 31.95143077 | 35.64739419 |
| Mortality | Female | 2033 | 33.79941248 | 31.86925854 | 35.72956642 |
| Mortality | Female | 2034 | 33.79941248 | 31.79044456 | 35.8083804 |
| Mortality | Female | 2035 | 33.79941248 | 31.71460795 | 35.88421701 |
| Mortality | Female | 2036 | 33.79941248 | 31.64143477 | 35.95739019 |
| Mortality | Female | 2037 | 33.79941248 | 31.57066268 | 36.02816228 |
| Mortality | Female | 2038 | 33.79941248 | 31.50206978 | 36.09675518 |
| Mortality | Female | 2039 | 33.79941248 | 31.43546634 | 36.16335862 |
| Mortality | Female | 2040 | 33.79941248 | 31.3706887 | 36.22813626 |
| Mortality | Female | 2041 | 33.79941248 | 31.30759446 | 36.2912305 |
